# Supplementary material
Source: PubMed Central journal article supplement (PMC1765435)

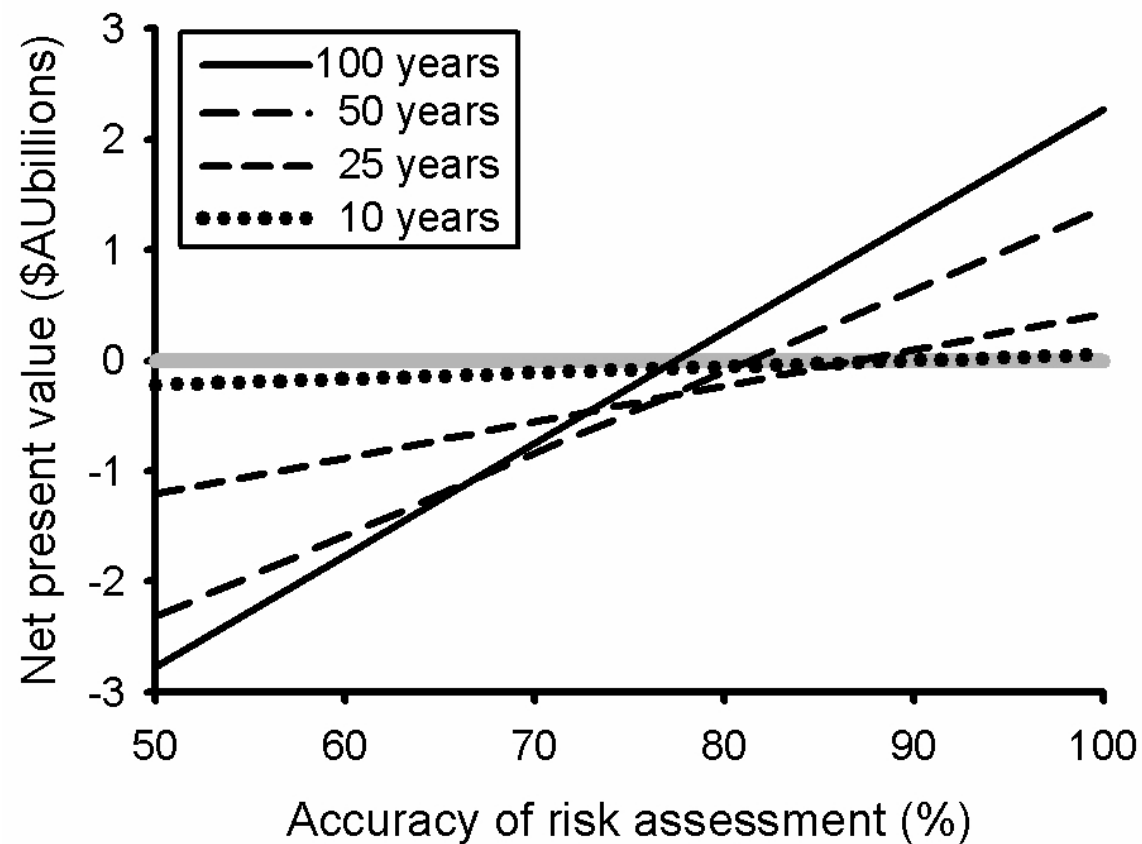

Supplement: pnas_0605787104_1.pdf [file pnas_0605787104_1.pdf]

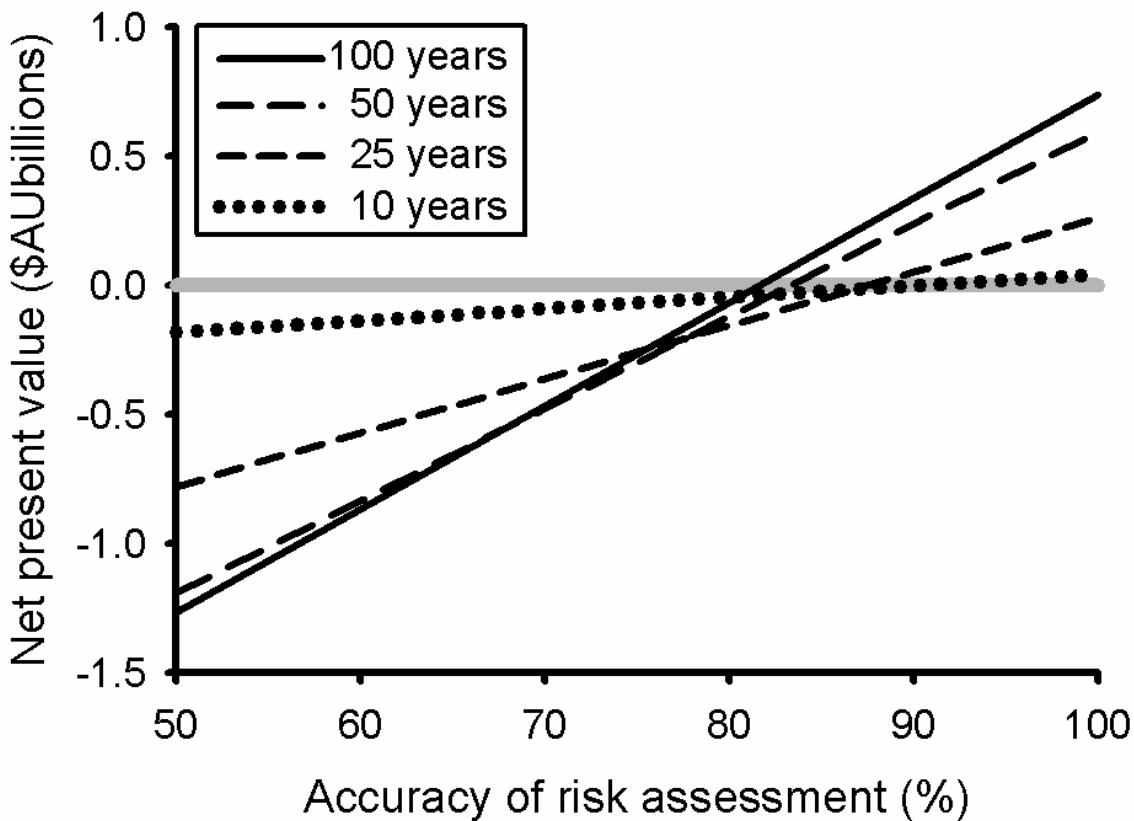

Supplement: pnas_0605787104_2.pdf [file pnas_0605787104_2.pdf]

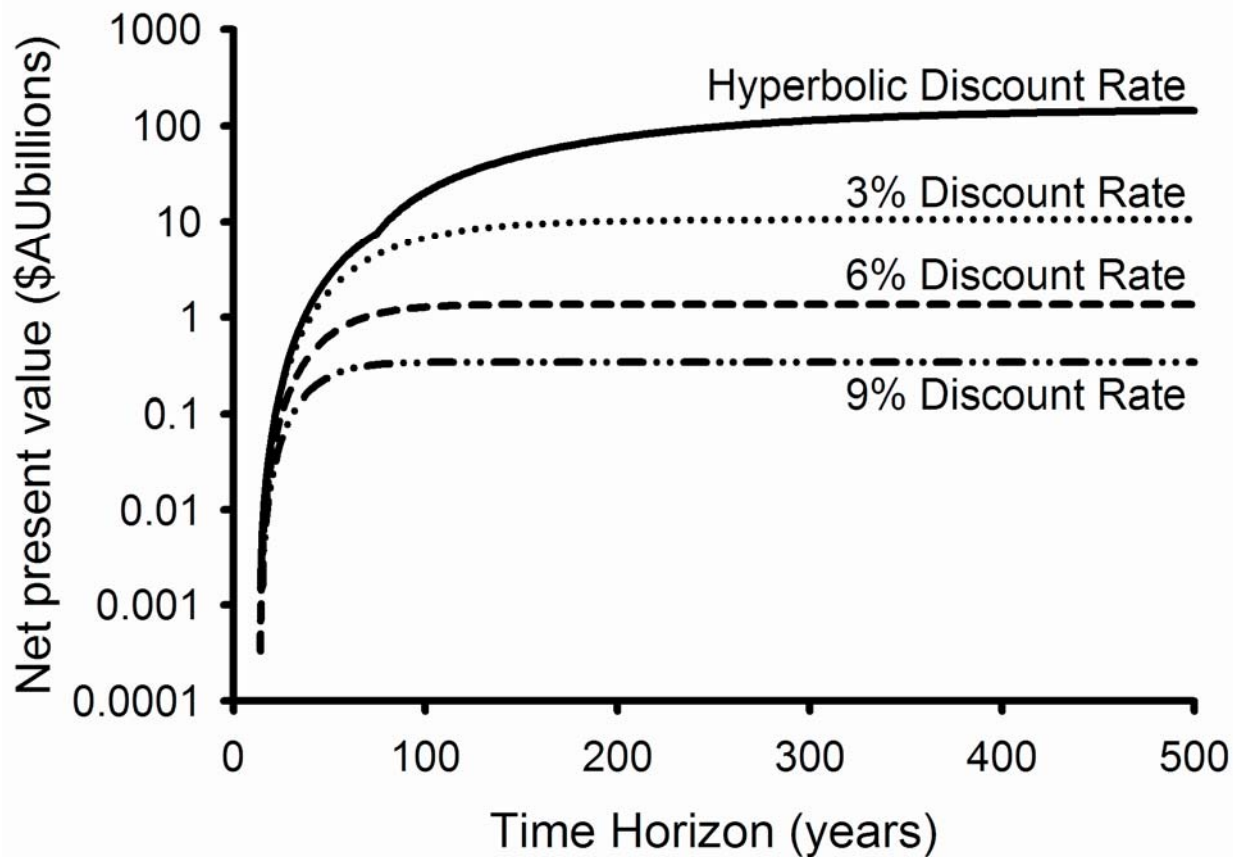

Supplement: pnas_0605787104_3.pdf [file pnas_0605787104_3.pdf]

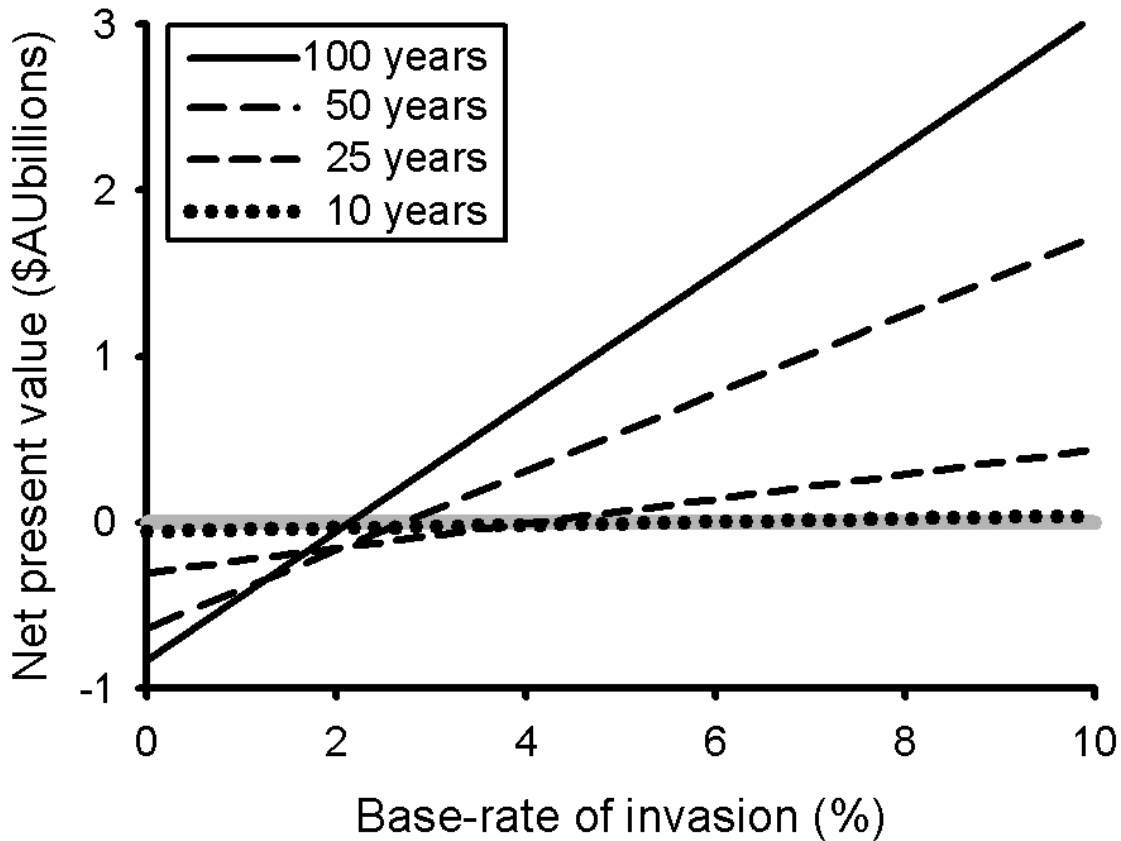

Supplement: pnas_0605787104_4.pdf [file pnas_0605787104_4.pdf]

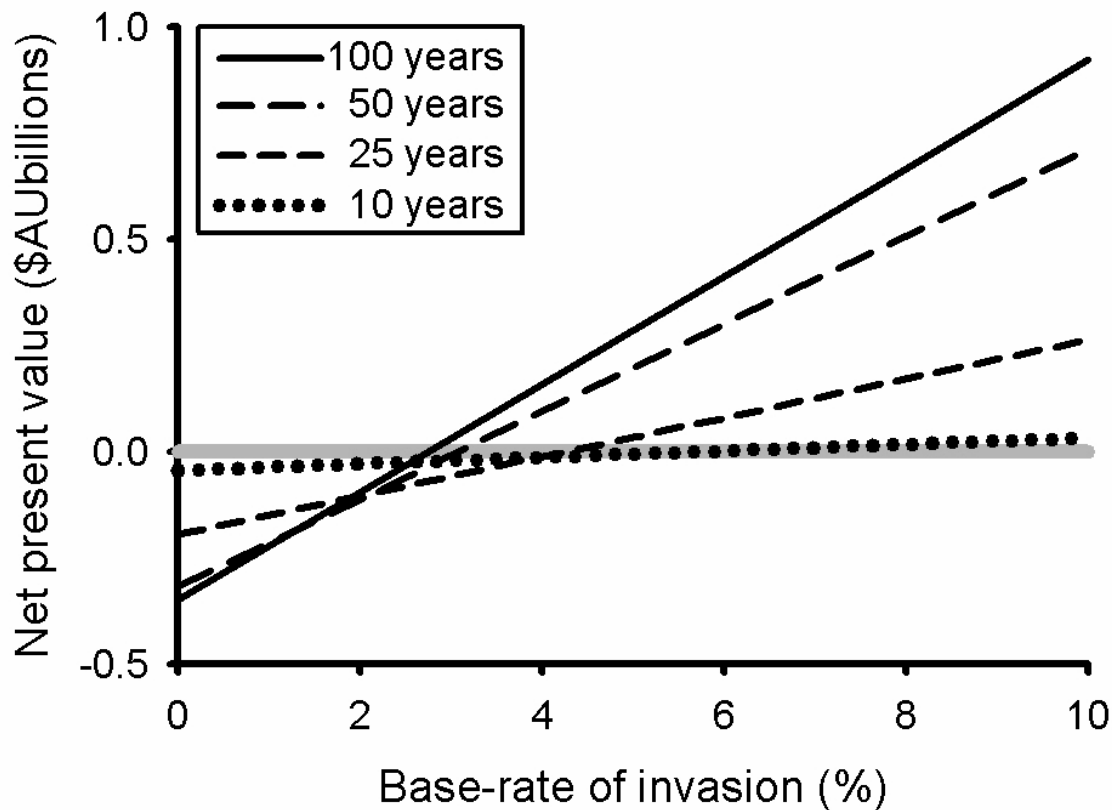

Supplement: pnas_0605787104_5.pdf [file pnas_0605787104_5.pdf]
